# Supplementary material
Source: PubMed Central journal article supplement (PMC2721478)

### **Characteristics of Colorectal Cancer Cell (CRC) Lines**

The panel of 18 human CRC cell lines used in this study reflects the range of genetic changes associated with colon cancer development<sup>1</sup> (Supplementary Table 1): most were mutant for both APC and K-Ras, with a minority harboring mutations in  $\beta$ -catenin rather than APC (i.e., HCT116 and LS180), or in B-Raf rather than K-Ras (i.e., Colo205).<sup>2-6</sup> Notably, while RKO cells have mutant B-Raf, they are wild-type for both APC and  $\beta$ -catenin, and show no aberrant activation of  $\beta$ -catenin signaling.<sup>4, 7</sup> The study also included an isogenic series of cell lines comprised of parental FET cells and FET cells transfected with TGF $\alpha$  (FET-6 $\alpha$ ), wild-type TGF $\beta$  receptor II (FET-RII), or a dominant negative form of TGF $\beta$ RII (FET/DNR). These cell lines differ in tumorigenic potential, with FET/DNR and FET-6 $\alpha$  being more tumorigenic than FET cells, and FET-RII exhibiting the lowest tumorigenicity.<sup>8, 9</sup> HCT116 and HCT116b cells were derived from the same primary tumor; HCT-116 cells have a more progressed tumor phenotype than HCT-116b cells, as characterized by more rapid proliferation and markedly higher tumorigenicity.<sup>7</sup> The HCT116T cell line is a clone isolated after transfection of HCT116 cells with a TGF $\alpha$  antisense vector, and is unaggressive.<sup>10</sup>

**Supplementary Table 1**

| CRC Cell Line               | APC Mutation | $\beta$ -catenin Mutation | K-Ras Mutation | Other mutations associated with intestinal tumorigenesis | Differentiation status | Aggressiveness | References              |
|-----------------------------|--------------|---------------------------|----------------|----------------------------------------------------------|------------------------|----------------|-------------------------|
| FET <sup>#</sup>            | +            | -                         | +              | p53                                                      | Well                   | Unaggressive   | 6, 9, 11-14             |
| FET-6 $\alpha$ <sup>#</sup> | +            | -                         | +              | p53                                                      | Moderate               | Intermediate   | 9                       |
| FET-RII <sup>#</sup>        | +            | -                         | +              | p53                                                      | Well                   | Unaggressive   | 9                       |
| FET/DNR <sup>#</sup>        | +            | -                         | +              | p53                                                      | Poor                   | Aggressive     | 9                       |
| HCT-15                      | +            | -                         | +              | p53, TGF $\beta$ -RII, PI3KCA                            | Moderate               | Intermediate   | 3, 6, 14-18             |
| CBS4                        | +            | NA                        | +              | NA                                                       | Well                   | Unaggressive   | 11-13, 15               |
| RKO                         | -            | -                         | -              | B-Raf, p53, PI3KCA                                       | Poor                   | Aggressive     | 12-16                   |
| TENN                        | +            | NA                        | -              | PI3KCA                                                   | Poor                   | Aggressive     | 12, 13                  |
| RCA                         | +            | +                         | NA             | NA                                                       | Moderate               | Intermediate   | 11, 13                  |
| Moser                       | +            | NA                        | NA             | NA                                                       | Moderate               | Intermediate   | 11                      |
| GEO                         | +            | NA                        | +              | NA                                                       | Well                   | Unaggressive   | 2, 11-13, 16            |
| DLD-1                       | +            | -                         | +              | p53, PI3KCA                                              | Poor                   | Intermediate   | 3, 14, 15, 18           |
| Colo205                     | +            | +                         | -              | p53, B-Raf, SMAD4                                        | Poor                   | Aggressive     | 2, 3, 14, 15, 17        |
| SW620                       | +            | -                         | +              | p53                                                      | Poor                   | Aggressive     | 2, 3, 14, 15, 17        |
| HCT116T <sup>*</sup>        | -            | +                         | +              | TGF $\beta$ -RII                                         | Poor                   | Unaggressive   | 10, 19                  |
| HCT116b <sup>*</sup>        | -            | +                         | +              | TGF $\beta$ -RII                                         | Poor                   | Unaggressive   | 7, 12                   |
| HCT116 <sup>*</sup>         | -            | +                         | +              | TGF $\beta$ -RII, E2F-4, PI3KCA                          | Poor                   | Aggressive     | 2, 6, 7, 12-18          |
| LS180                       | -            | +                         | +              | TGF $\beta$ -RII, TCF-4, PIK3CA                          | Well                   | Aggressive     | 2, 3, 6, 11, 14, 15, 17 |

\* HCT116 and HCT116b cell lines were established from the same primary tumor. HCT116T denotes HCT116 cells transfected with a TGF- $\alpha$  antisense vector and stably selected.

# FET cell line derivatives include FET-6 $\alpha$  cells, which overexpress TGF- $\alpha$ ; FET-RII cells, which overexpress TGF- $\beta$  RII; and FET/DNR cells, which express dominant negative TGF- $\beta$  RII.

NA = Not available.

## **References:**

1. Fearon ER, Vogelstein B. A genetic model for colorectal tumorigenesis. *Cell* 1990;61:759-67.
2. Ilyas M, Tomlinson IP, Rowan A, et al. Beta-catenin mutations in cell lines established from human colorectal cancers. *Proc Natl Acad Sci U S A* 1997;94:10330-4.
3. Trainer DL, Kline T, McCabe FL, et al. Biological characterization and oncogene expression in human colorectal carcinoma cell lines. *Int J Cancer* 1988;41:287-96.
4. da Costa LT, He TC, Yu J, et al. CDX2 is mutated in a colorectal cancer with normal APC/beta-catenin signaling. *Oncogene* 1999;18:5010-4.
5. Rowan AJ, Lamlum H, Ilyas M, et al. APC mutations in sporadic colorectal tumors: A mutational "hotspot" and interdependence of the "two hits". *Proc Natl Acad Sci U S A* 2000;97:3352-7.
6. Gayet J, Zhou XP, Duval A, et al. Extensive characterization of genetic alterations in a series of human colorectal cancer cell lines. *Oncogene* 2001;20:5025-32.
7. Brattain MG, Levine AE, Chakrabarty S, et al. Heterogeneity of human colon carcinoma. *Cancer Metastasis Rev* 1984;3:177-91.
8. Jiang D, Yang H, Willson JK, et al. Autocrine transforming growth factor alpha provides a growth advantage to malignant cells by facilitating re-entry into the cell cycle from suboptimal growth states. *J Biol Chem* 1998;273:31471-9.
9. Ye SC, Foster JM, Li W, et al. Contextual effects of transforming growth factor beta on the tumorigenicity of human colon carcinoma cells. *Cancer Res* 1999;59:4725-31.
10. Howell GM, Humphrey LE, Ziober BL, et al. Regulation of transforming growth factor alpha expression in a growth factor-independent cell line. *Mol Cell Biol* 1998;18:303-13.
11. Chantret I, Barbat A, Dussaulx E, et al. Epithelial polarity, villin expression, and enterocytic differentiation of cultured human colon carcinoma cells: a survey of twenty cell lines. *Cancer Res* 1988;48:1936-42.
12. Buard A, Zipfel PA, Frey RS, et al. Maintenance of growth factor signaling through Ras in human colon carcinoma cells containing K-ras mutations. *Int J Cancer* 1996;67:539-46.
13. Wang J, Kuropatwinski K, Hauser J, et al. Colon carcinoma cells harboring PIK3CA mutations display resistance to growth factor deprivation induced apoptosis. *Mol Cancer Ther* 2007;6:1143-50.
14. Schwartz S Jr . DE. BRAF. *Atlas Genet Cytogenet Oncol Haematol.* , 2004.
15. ATCC. Volume 2008. Manasses, 2008.
16. Jhawer M, Goel S, Wilson AJ, et al. PIK3CA mutation/PTEN expression status predicts response of colon cancer cells to the epidermal growth factor receptor inhibitor cetuximab. *Cancer Res* 2008;68:1953-61.
17. Institute S. Cambridge, UK, 2008.
18. Jhawer M, Goel S, Wilson AJ, et al. PIK3CA mutation/PTEN expression status predicts response of colon cancer cells to the epidermal growth factor receptor inhibitor cetuximab. *Cancer Res* 2008;68:1953-61.

19. Brattain MG, Fine WD, Khaled FM, et al. Heterogeneity of malignant cells from a human colonic carcinoma. *Cancer Res* 1981;41:1751-6.

## **SUPPLEMENTARY INFORMATION**

### **Supplementary Figure Legends**

**Supplementary Figure 1.** CRC cells infected with LacZ, PKC $\alpha$ , or PKC $\delta$  adenovirus were stained with propidium iodide, and percentage of cells in G1, S, and G2/M phases was determined by flow cytometry. Data represent the average of 2 independent experiments  $\pm$  s.e.

**Supplementary Figure 2A.** PKC $\alpha$  expression does not affect cyclin D1 protein stability. *Left Panel:* LacZ- and PKC $\alpha$ -transduced DLD-1 cells were treated with 30  $\mu$ g/mL CHX for various times and subjected to anti-cyclin D1 immunoblotting. Fast green-stained membranes are shown as loading controls. A longer exposure is shown for PKC $\alpha$ -transduced cells to facilitate comparison between samples. The graph shows densitometric quantification of cyclin D1 levels normalized to 0 h control. *Right panel:* Lighter exposure at time 0 confirms down-regulation of cyclin D1 steady-state levels in PKC $\alpha$ -transduced cells. Data are representative of 2 independent experiments.

**Supplementary Figure 2B.** Northern blot (NB) analysis of cyclin D1 mRNA in DLD-1 cells treated with 2  $\mu$ g/mL ActD for the indicated times. The graph shows relative levels of cyclin D1 mRNA normalized to 28S RNA. Data are representative of  $\geq 2$  independent experiments.

**Supplementary Figure 3.** CRC cells were infected with LacZ, PKC $\alpha$ , or PKC $\delta$  adenovirus as indicated and plated in soft agarose. Colonies were imaged after 1-2 weeks.

**Supplementary Figure 4A.** Immunoblot analysis of cyclin D1, phospho-EGFR (Tyr<sup>1173</sup>) (indicative of EGFR activation), and total EGFR in FET and GEO cells transduced with LacZ or PKC $\alpha$  adenovirus. Actin: loading control. Data are representative of  $\geq 2$  independent experiments.

**Supplementary Figure 4B.** SW620 cells, which do not express EGFR, were infected with 20 moi LacZ, PKC $\alpha$ , or PKC $\delta$  adenovirus. After 48 h expression of the indicated proteins was detected by immunoblot analysis. Fast Green staining shows even protein loading. Data are representative of  $\geq 2$  independent experiments.

# Supplementary Figure 1

Pysz et al.

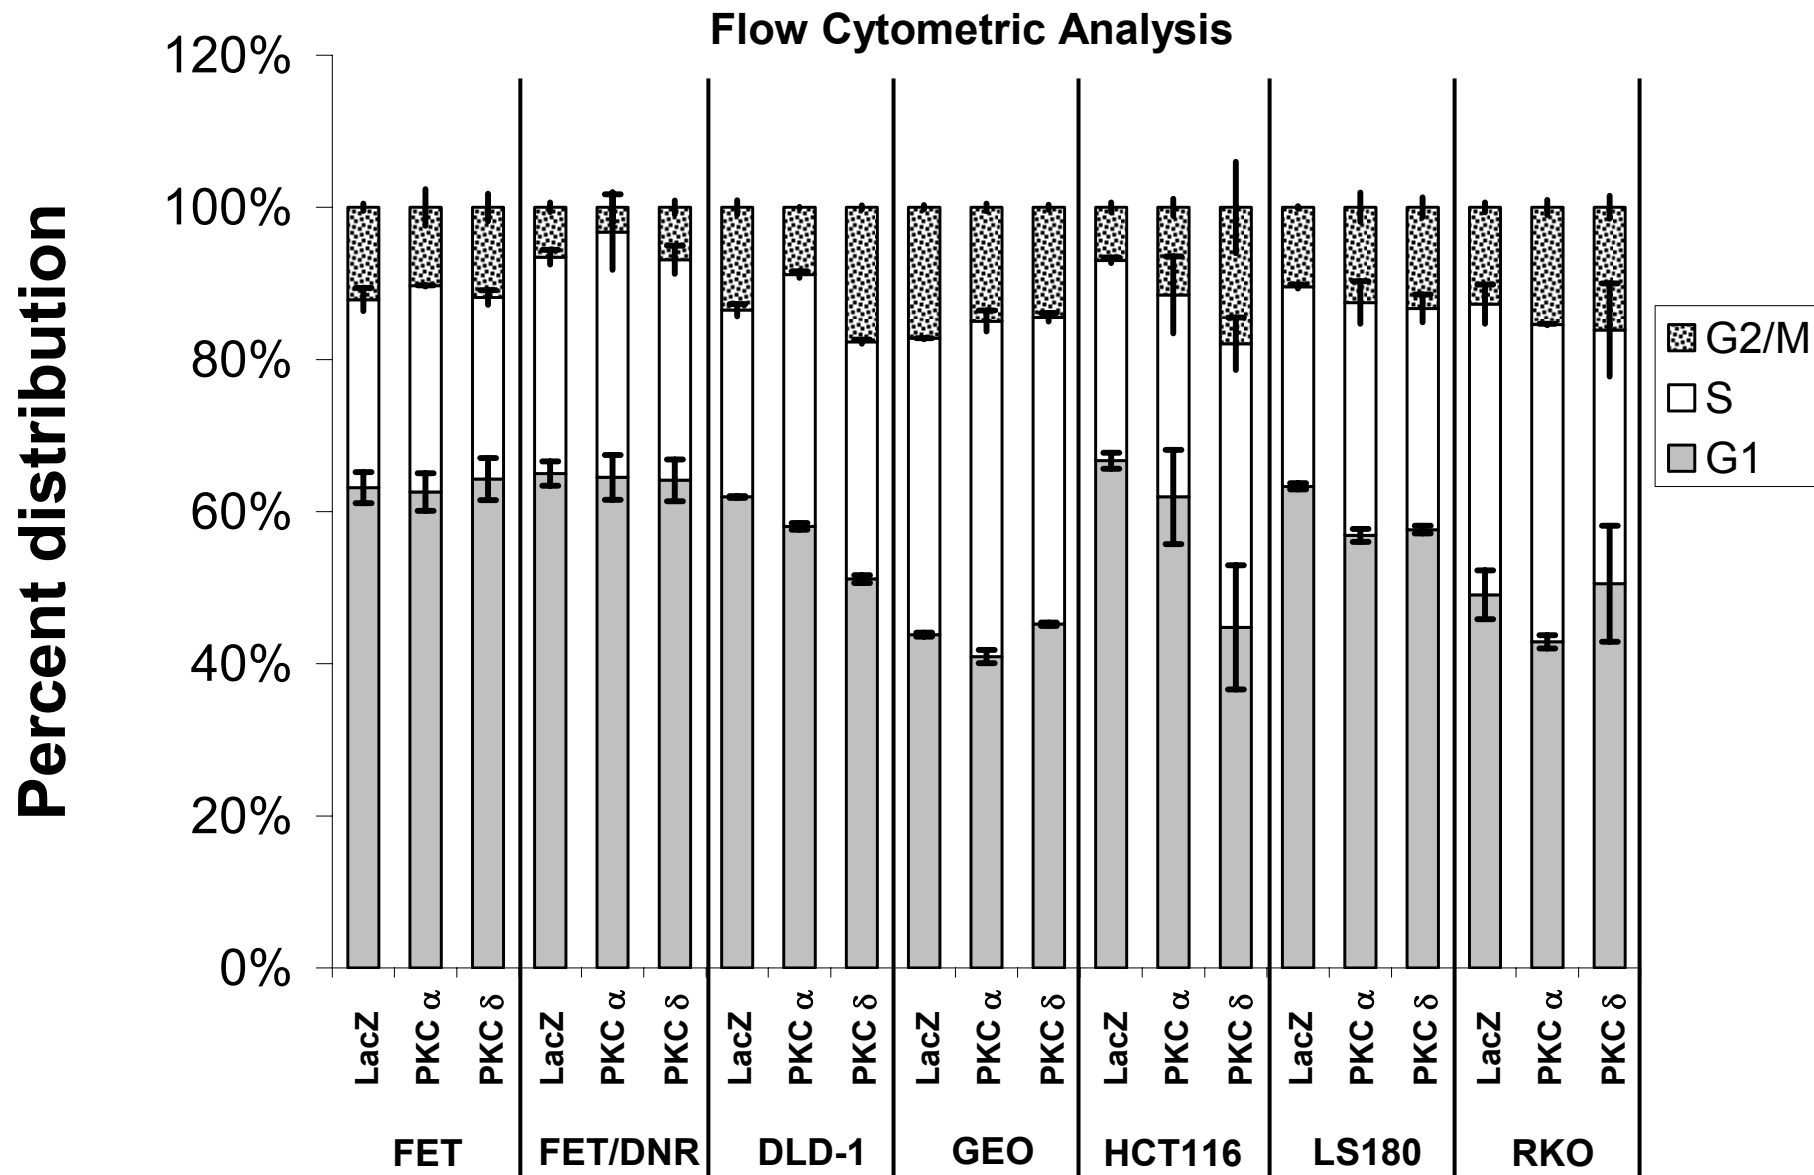

# Supplementary Figure 2A

Pysz et al.

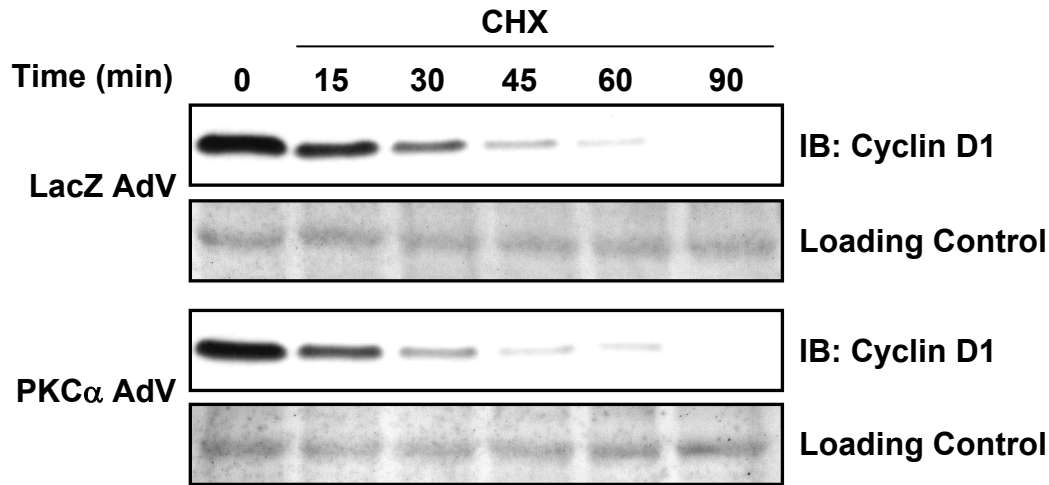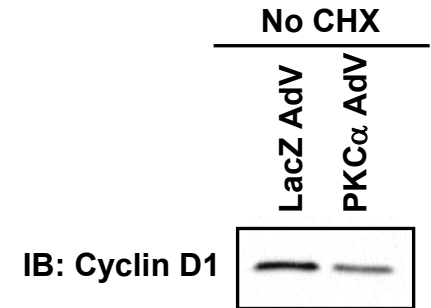

## Quantification of IB:Cyclin D1

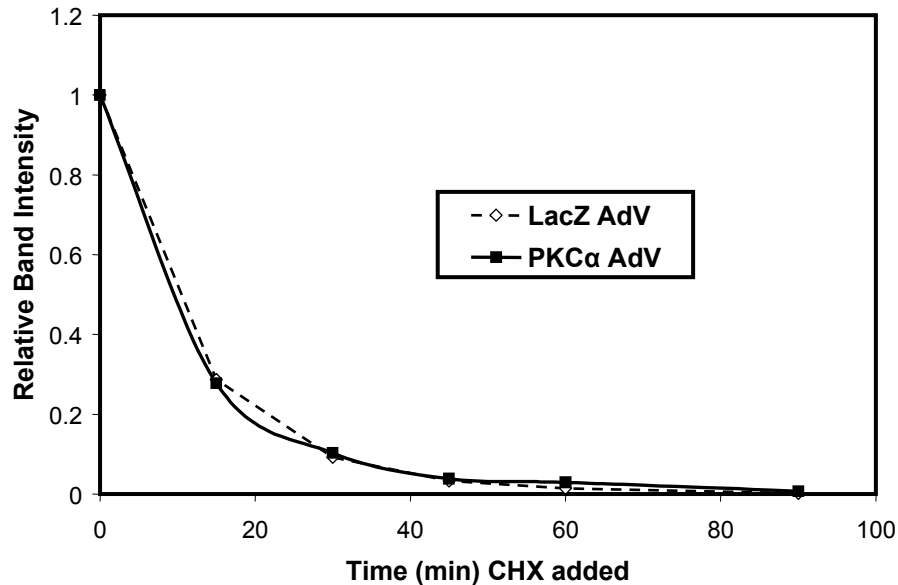



# Supplementary Figure 2B

Pysz et al.

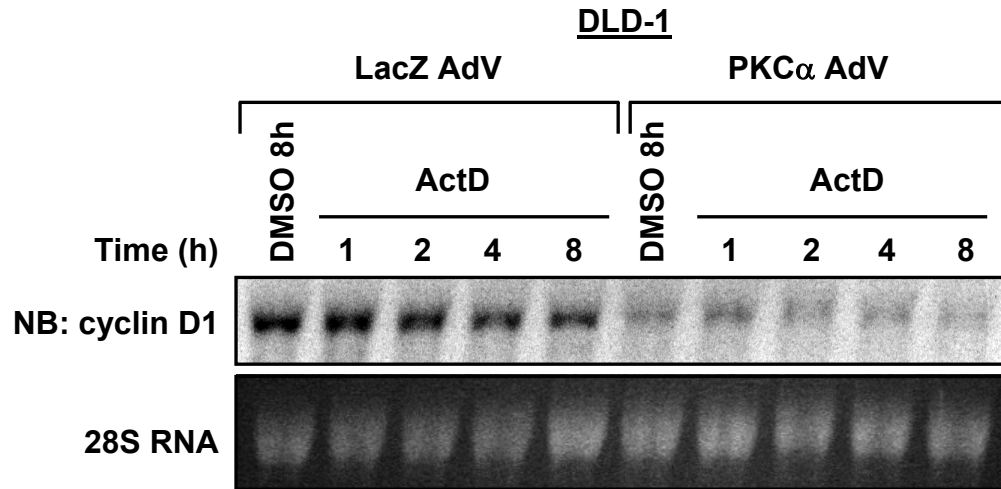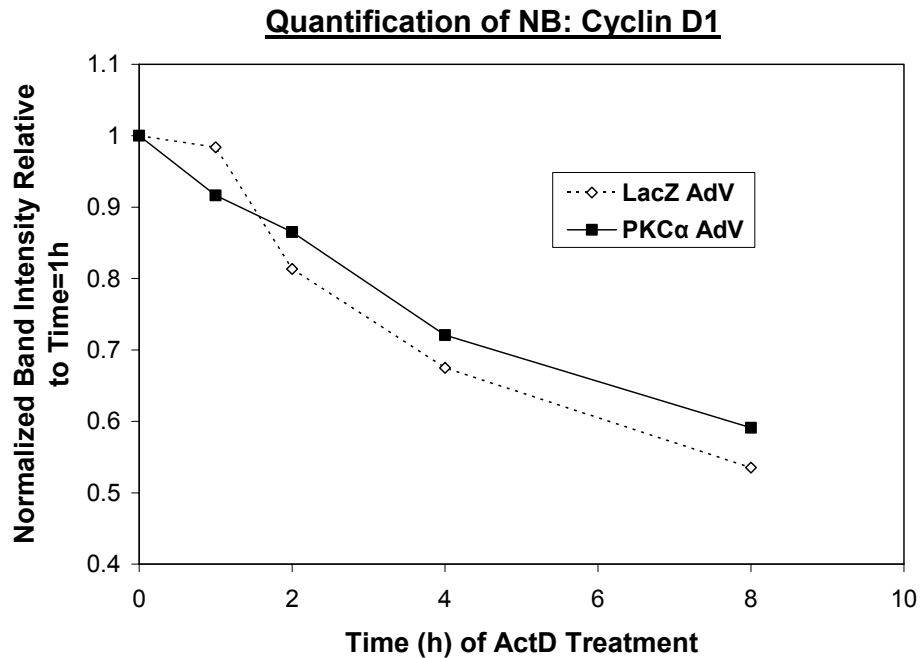

# Supplementary Figure 3

Pysz et al.

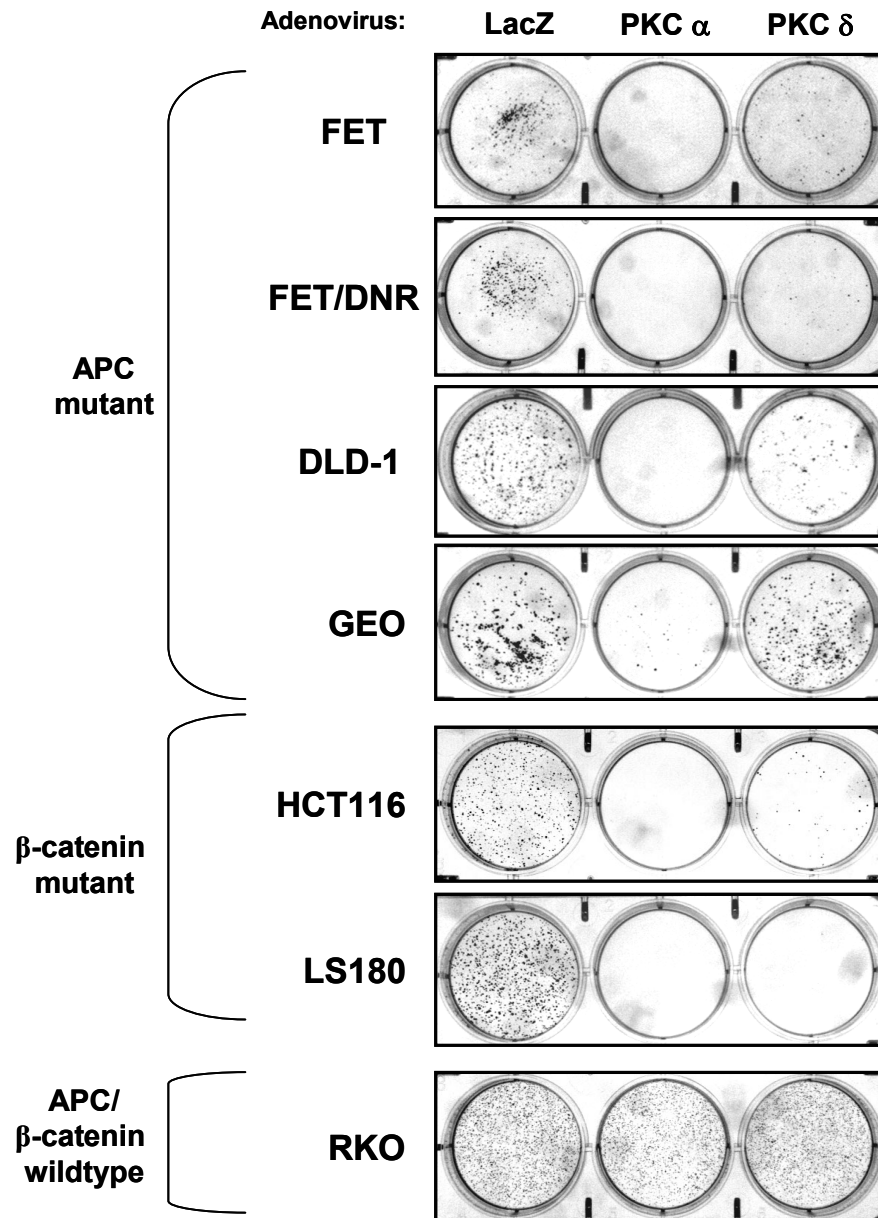

# Supplementary Figure 4

Pysz et al.

A.

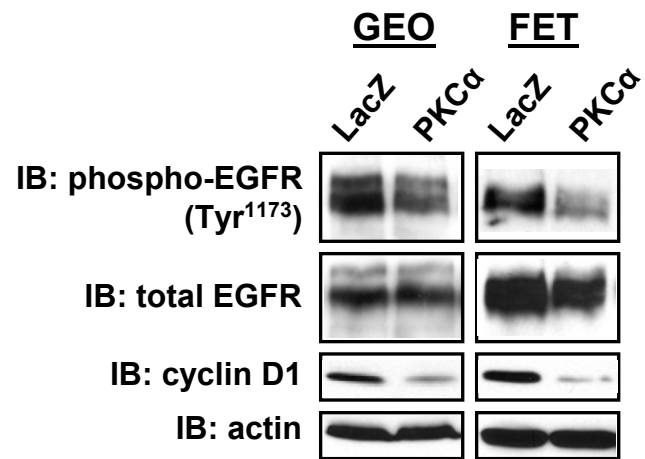

B.

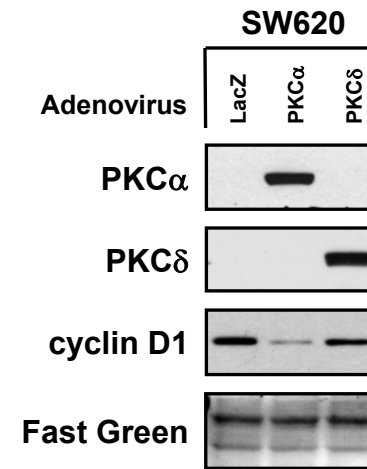

Supplement: NIHMS113600-supplement-01.pdf [file NIHMS113600-supplement-01.pdf]
